# Supplementary material for: Recurrence‐free interval 12 months after local treatment of mast cell tumors in dogs using intratumoral injection of tigilanol tiglate
Source: PubMed Central journal article supplement — J Vet Intern Med. 2020 Dec 22;35(1):451–5. doi: 10.1111/jvim.16018 (PMC7848364; doi:10.1111/jvim.16018), 2020-12-22
Supplement: JVIM-35-451-s001.pdf [file JVIM-35-451-s001.pdf]

**Table S1:** Demographics and tumor characteristics of dogs from the US efficacy study eligible for inclusion in this longitudinal study (single treatment of tigilanol tiglate that achieved a CR at Day 28, n=85).

| Variable                                            | Tigilanol tiglate-treated group |
|-----------------------------------------------------|---------------------------------|
| <b>PATIENT DEMOGRAPHICS</b>                         |                                 |
| <i>Age (years) at screening</i>                     |                                 |
| Mean (range)                                        | 8.8 (3.5 to 15.9)               |
| <i>Sex</i>                                          |                                 |
| Female                                              | 51 (60%)                        |
| Male                                                | 34 (40%)                        |
| <i>Breed</i>                                        |                                 |
| High MCT-risk breeds <sup>1</sup>                   | 44 (52%)                        |
| Other breeds                                        | 41 (48%)                        |
| <b>TUMOR CHARACTERISTICS</b>                        |                                 |
| <i>Tumor location</i>                               |                                 |
| Body                                                | 35 (41%)                        |
| Upper limb                                          | 34 (40%)                        |
| Lower limb                                          | 16 (19%)                        |
| <i>Tumor volume on day 0 (cm<sup>3</sup>)</i>       |                                 |
| <.5                                                 | 28 (33%)                        |
| .5 to <2                                            | 33 (39%)                        |
| 2 to 10                                             | 24 (28%)                        |
| <i>Cytological grade of tumor</i>                   |                                 |
| High                                                | 2 (2%)                          |
| High suspected                                      | 2 (2%)                          |
| Low                                                 | 62 (73%)                        |
| Low suspected                                       | 14 (17%)                        |
| Grade not available                                 | 5 (5%)                          |
| <i>Regional lymph node(s) enlarged at screening</i> |                                 |
| No                                                  | 77 (91%)                        |
| Yes <sup>2</sup>                                    | 8 (9%)                          |
| <i>Tumor type</i>                                   |                                 |
| Cutaneous                                           | 75 (88%)                        |
| Subcutaneous                                        | 10 (12%)                        |

<sup>1</sup>Dog breeds with known high risk of MCT; consisted of boxers and other brachycephalic breeds, Staffordshire bull terriers, Labradors, Golden retrievers, Rhodesian ridgebacks, Beagles and Mastiffs.

<sup>2</sup>Regional lymph nodes that were enlarged on palpation at screening but no MCT disease was found on fine needle aspiration, allowing the dog to be eligible for enrolment in the study; no aspirates were collected where lymph nodes were not enlarged.
